# Supplementary material for: Evaluation of graphene-wrapped LiFePO4 as novel cathode materials for Li-ion batteries
Source: Royal Society of Chemistry journal article supplement (doi:10.1039/c6ra24514e), 2016-01-01
Supplement: c6ra24514e1.pdf [file c6ra24514e1.pdf]

Supporting Information

## Evaluation of Graphene-Wrapped LiFePO<sub>4</sub> as Novel Cathode Materials for Li-Ion Batteries

Sungun Wi,<sup>†a</sup> Jaewon Kim,<sup>†a</sup> Kimin Park,<sup>†a</sup> Sangheon Lee,<sup>a</sup> Joonhyeon Kang,<sup>a</sup> Kyung Hwan Kim,<sup>a</sup> Seunghoon Nam,<sup>\*b</sup> Chunjoong Kim<sup>\*c</sup> and Byungwoo Park<sup>\*a</sup>

<sup>a</sup> WCU Hybrid Materials Program, Department of Materials Science and Engineering, Research Institute of Advanced Materials, Seoul National University, Seoul 08826, Korea. E-mail: byungwoo@snu.ac.kr; Tel: +82-2-880-8319; Fax: +82-2-885-9671.

<sup>b</sup> Department of Nano Mechanics, Nano Mechanical Systems Research Division, Korea Institute of Machinery and Materials (KIMM), Daejeon 34103, Korea. E-mail: kwek14@kimm.re.kr; Tel: +82-42-868-7182; Fax: +82-42-868-7824.

<sup>c</sup> School of Materials Science and Engineering, Chungnam National University, Daejeon 34134, Korea. E-mail: ckim0218@cnu.ac.kr; Tel: +82-42-821-5635; Fax: +82-42-822-5850.

**Table S1.** Carbon content and grain size of the bare LiFePO<sub>4</sub>, graphene-wrapped commercial LiFePO<sub>4</sub>, and graphene-wrapped LiFePO<sub>4</sub>.

| Sample                   | C [wt. %] | Grain Size [nm]                          |
|--------------------------|-----------|------------------------------------------|
| Bare LiFePO <sub>4</sub> | -         | ~400 (from SEM)                          |
| c-LiFePO <sub>4</sub> /G | 2.1       | ~400 (from SEM)                          |
| LiFePO <sub>4</sub> /G   | 1.7       | 83 ± 10 (from XRD)<br>67 ± 25 (from SEM) |

**Table S2.** Impedance parameters extracted using a modified Randles' equivalent circuit for the  $\text{LiFePO}_4/\text{G}$  and  $c\text{-LiFePO}_4/\text{G}$ . In Randles' circuit,  $R_s$  (series resistance) represents the high-frequency resistance of the electrolyte.  $CPE_{dl}$  (constant phase element) reflects imperfect capacitance of the electrochemical double layer between the electrolyte and electrode.  $R_{ct}$  (charge-transfer resistance) is associated with the ion injection and the electron transfer from the electrolyte into the electrode.  $Z_w$  is the Warburg impedance.

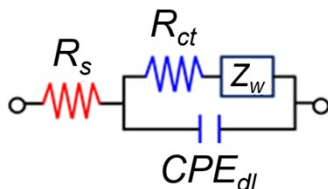

| Parameters                        | $R_{ct}$<br>[ $\Omega$ g] | Warburg factor $\sigma$ | $D_{EIS}$<br>[ $\times 10^{-12}$ $\text{cm}^2 \text{s}^{-1}$ ] |
|-----------------------------------|---------------------------|-------------------------|----------------------------------------------------------------|
| <b>LiFePO<sub>4</sub>/G (C0)</b>  | 0.0181 ± 0.0001           | 0.04652 ± 0.00133       | 143                                                            |
| <b>LiFePO<sub>4</sub>/G (C1)</b>  | 0.0164 ± 0.0005           | 0.00687 ± 0.00014       | 3.1                                                            |
| <b>LiFePO<sub>4</sub>/G (C2)</b>  | 0.0184 ± 0.0003           | 0.00621 ± 0.00058       | 2.5                                                            |
| <b>LiFePO<sub>4</sub>/G (C3)</b>  | 0.0191 ± 0.0003           | 0.00625 ± 0.00014       | 2.6                                                            |
| <b>LiFePO<sub>4</sub>/G (C4)</b>  | 0.0195 ± 0.0003           | 0.00629 ± 0.00035       | 2.6                                                            |
| <b>LiFePO<sub>4</sub>/G (C5)</b>  | 0.0198 ± 0.0003           | 0.00638 ± 0.00052       | 2.7                                                            |
| <b>LiFePO<sub>4</sub>/G (C6)</b>  | 0.0199 ± 0.0003           | 0.00665 ± 0.00072       | 2.9                                                            |
| <b>LiFePO<sub>4</sub>/G (C7)</b>  | 0.0201 ± 0.0003           | 0.00731 ± 0.00079       | 3.5                                                            |
| <b>LiFePO<sub>4</sub>/G (C8)</b>  | 0.0197 ± 0.0003           | 0.00892 ± 0.00093       | 5.2                                                            |
| <b>LiFePO<sub>4</sub>/G (C9)</b>  | 0.0197 ± 0.0002           | 0.02432 ± 0.00023       | 38.5                                                           |
| <b>LiFePO<sub>4</sub>/G (C10)</b> | 0.0222 ± 0.0002           | 0.01744 ± 0.00141       | 20.1                                                           |
| <b>LiFePO<sub>4</sub>/G (D1)</b>  | 0.0222 ± 0.0002           | 0.01744 ± 0.00141       | 20.1                                                           |
| <b>LiFePO<sub>4</sub>/G (D2)</b>  | 0.0181 ± 0.0001           | 0.00348 ± 0.00003       | 0.8                                                            |
| <b>LiFePO<sub>4</sub>/G (D3)</b>  | 0.0164 ± 0.0005           | 0.00388 ± 0.00004       | 0.9                                                            |
| <b>LiFePO<sub>4</sub>/G (D4)</b>  | 0.0184 ± 0.0003           | 0.00433 ± 0.00004       | 1.2                                                            |
| <b>LiFePO<sub>4</sub>/G (D5)</b>  | 0.0191 ± 0.0003           | 0.00487 ± 0.00003       | 1.6                                                            |
| <b>LiFePO<sub>4</sub>/G (D6)</b>  | 0.0195 ± 0.0003           | 0.00554 ± 0.00002       | 2.1                                                            |
| <b>LiFePO<sub>4</sub>/G (D7)</b>  | 0.0198 ± 0.0003           | 0.00637 ± 0.00002       | 2.7                                                            |
| <b>LiFePO<sub>4</sub>/G (D8)</b>  | 0.0199 ± 0.0003           | 0.00753 ± 0.00003       | 3.7                                                            |
| <b>LiFePO<sub>4</sub>/G (D9)</b>  | 0.0201 ± 0.0003           | 0.00931 ± 0.00006       | 5.7                                                            |
| <b>LiFePO<sub>4</sub>/G (D10)</b> | 0.0197 ± 0.0003           | 0.01248 ± 0.00009       | 10.3                                                           |
| <b>LiFePO<sub>4</sub>/G (D11)</b> | 0.0197 ± 0.0002           | 0.01965 ± 0.00003       | 25.4                                                           |

| Parameters                    | $R_{ct}$<br>[ $\Omega$ g] | Warburg factor $\sigma$ | $D_{EIS}$<br>[ $\times 10^{-10}$ cm <sup>2</sup> s <sup>-1</sup> ] |
|-------------------------------|---------------------------|-------------------------|--------------------------------------------------------------------|
| c-LiFePO <sub>4</sub> /G (C0) | 0.068 ± 0.017             | 0.289 ± 0.005           | 55.3                                                               |
| c-LiFePO <sub>4</sub> /G (C1) | 0.069 ± 0.001             | 0.226 ± 0.003           | 33.9                                                               |
| c-LiFePO <sub>4</sub> /G (C2) | 0.124 ± 0.045             | 0.055 ± 0.001           | 2.0                                                                |
| c-LiFePO <sub>4</sub> /G (C3) | 0.179 ± 0.009             | 0.056 ± 0.002           | 2.0                                                                |
| c-LiFePO <sub>4</sub> /G (C4) | 0.199 ± 0.016             | 0.008 ± 0.001           | 4.7                                                                |
| c-LiFePO <sub>4</sub> /G (C5) | 0.349 ± 0.026             | 0.182 ± 0.007           | 21.8                                                               |
| c-LiFePO <sub>4</sub> /G (C6) | 0.483 ± 0.003             | 0.211 ± 0.003           | 29.1                                                               |
| c-LiFePO <sub>4</sub> /G (D1) | 0.483 ± 0.003             | 0.211 ± 0.003           | 29.1                                                               |
| c-LiFePO <sub>4</sub> /G (D2) | 0.471 ± 0.016             | 0.107 ± 0.008           | 7.6                                                                |
| c-LiFePO <sub>4</sub> /G (D3) | 0.464 ± 0.027             | 0.116 ± 0.007           | 8.9                                                                |
| c-LiFePO <sub>4</sub> /G (D4) | 0.453 ± 0.029             | 0.129 ± 0.005           | 10.9                                                               |
| c-LiFePO <sub>4</sub> /G (D5) | 0.383 ± 0.012             | 0.137 ± 0.001           | 12.3                                                               |
| c-LiFePO <sub>4</sub> /G (D6) | 0.382 ± 0.011             | 0.136 ± 0.001           | 12.1                                                               |
| c-LiFePO <sub>4</sub> /G (D7) | 0.334 ± 0.009             | 0.152 ± 0.005           | 15.2                                                               |

The Li-ion diffusion coefficient ( $D_{EIS}$ ) from *in situ* electrochemical impedance spectra (EIS) is presented as:

$$D_{EIS} = \left( \frac{R^2 T^2}{2A^2 n^4 F^4 C_{Li}^2 \sigma^2} \right), \quad (1)$$

where  $D_{EIS}$  is the diffusion coefficient (cm<sup>2</sup> s<sup>-1</sup>) of Li in the low-frequency ( $\leq 10$  Hz) region,  $A$  is the surface area of the electrode (cm<sup>2</sup> g<sup>-1</sup>),  $n$  is the number of electrons,  $F$  is the Faraday constant (96485 C mol<sup>-1</sup>),  $C_{Li}$  is the concentration of Li<sup>+</sup> (mol cm<sup>-3</sup>), and  $\sigma$  is the Warburg factor obtained from the slope of the lines between the real axis  $Z'$  and the reciprocal square root of the lower angular frequencies  $\omega^{-1/2}$  ( $Z' = R_s + R_{ct} + \sigma \omega^{-1/2}$ ).

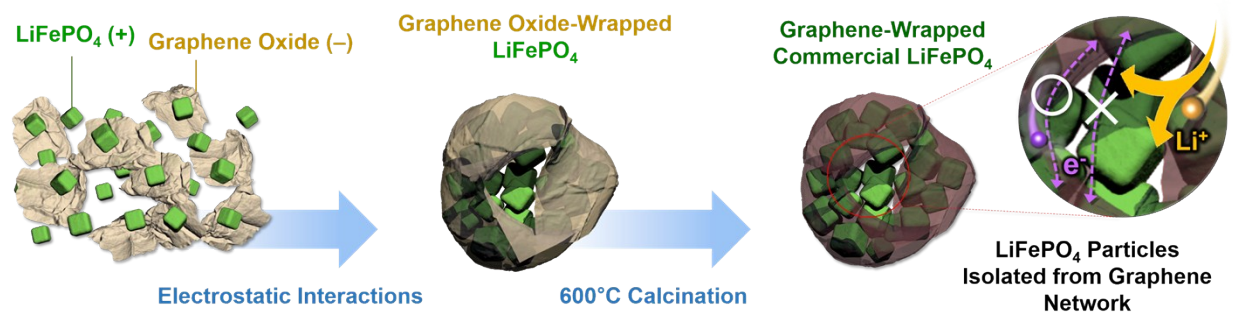

**Figure S1.** Schematic illustration showing the synthetic process for the graphene-wrapped commercial  $\text{LiFePO}_4$ .

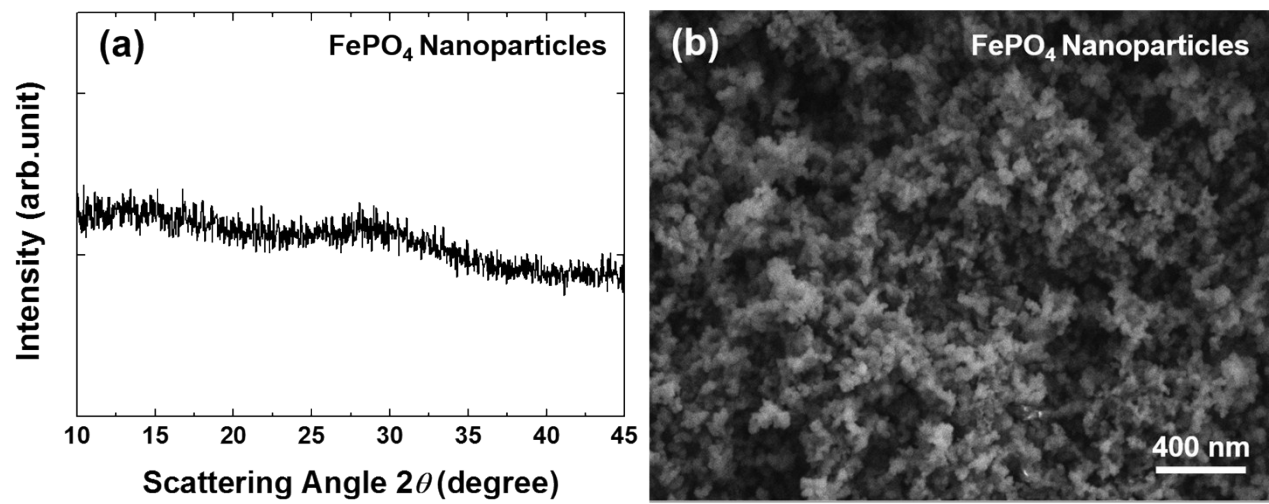

**Figure S2.** (a) XRD pattern and (b) SEM image of the amorphous FePO<sub>4</sub> nanoparticles.

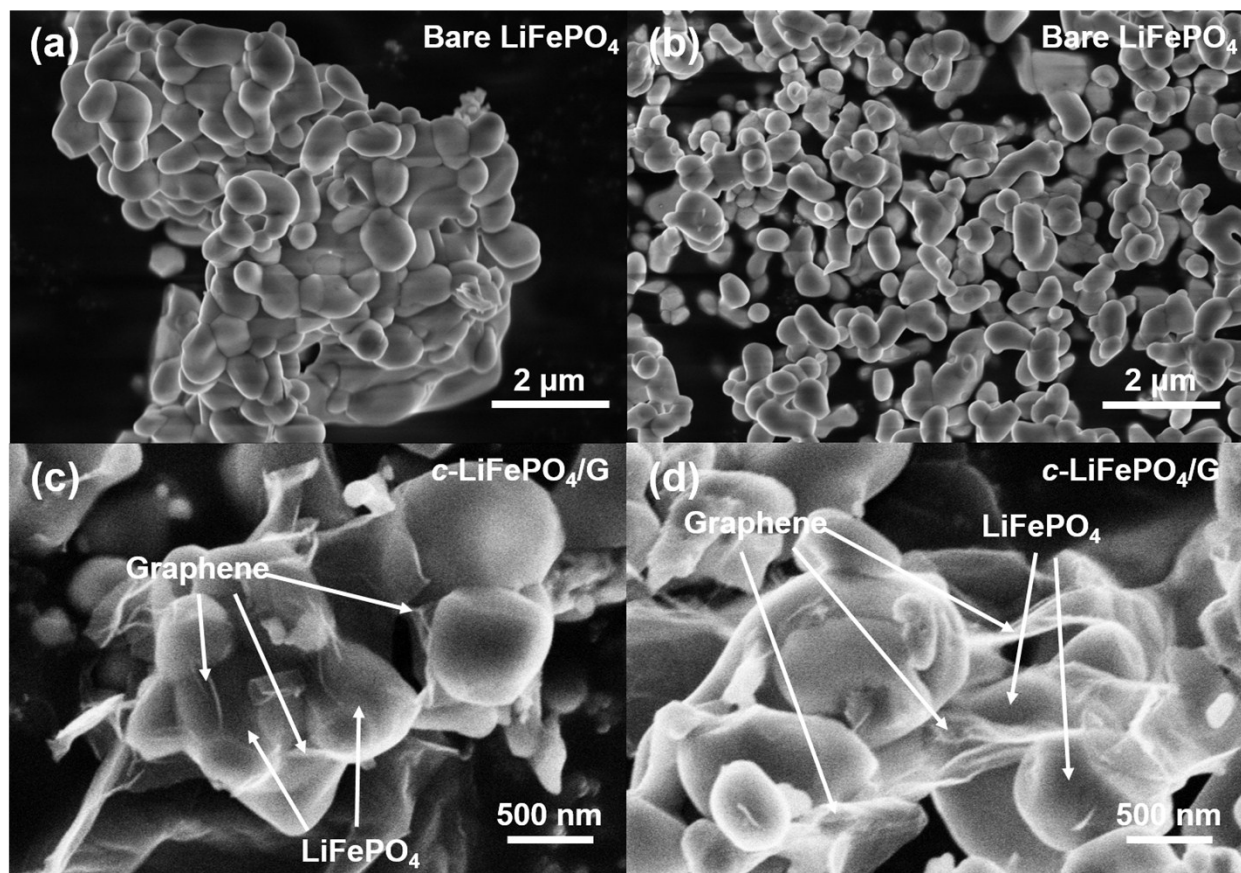

**Figure S3.** SEM images of the (a-b) bare LiFePO<sub>4</sub> and (c-d) graphene-wrapped commercial LiFePO<sub>4</sub>.

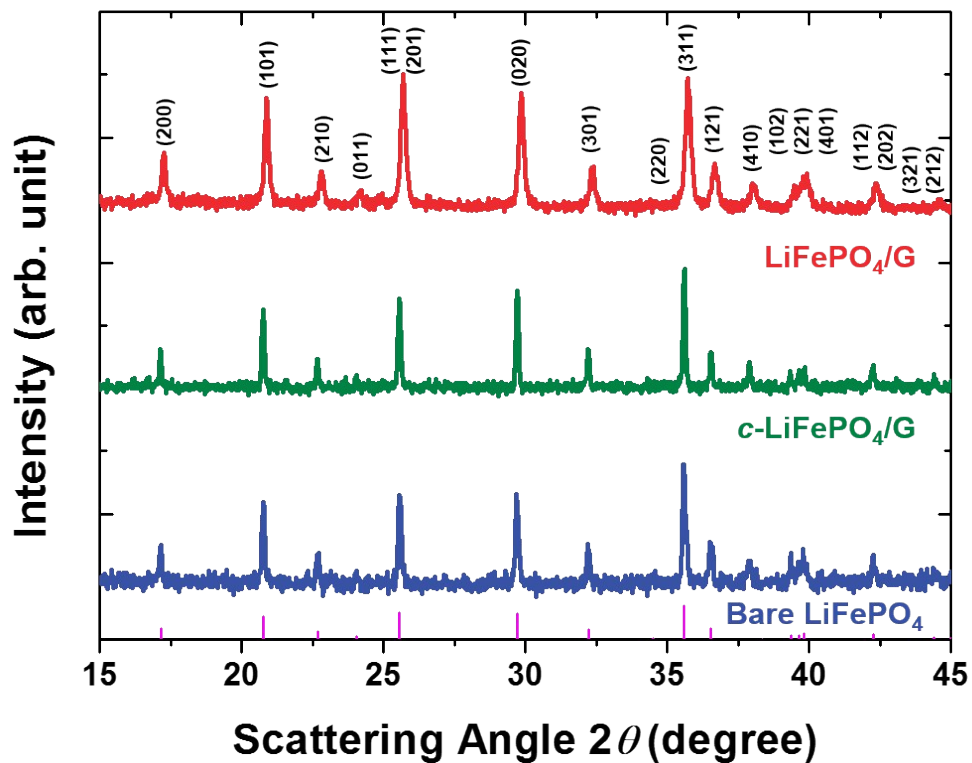

**Figure S4.** XRD patterns of the bare LiFePO<sub>4</sub>, graphene-wrapped commercial LiFePO<sub>4</sub>, and graphene-wrapped LiFePO<sub>4</sub>. The ideal peak positions and intensities for LiFePO<sub>4</sub> (JCPDS #40-1499) are marked at the bottom.

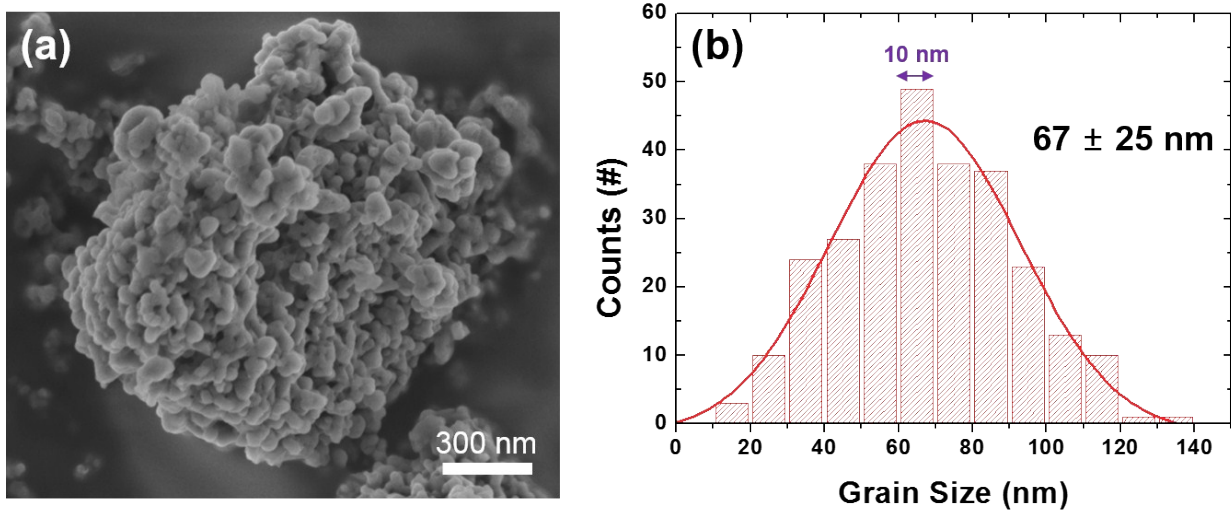

**Figure S5.** (a) SEM image of the graphene-eliminated  $\text{LiFePO}_4$ , and (b) grain-size distribution of the graphene-wrapped  $\text{LiFePO}_4$ .
